# Supplementary material
Source: PubMed Central journal article supplement (PMC4447231)
Supplement: supp_fj.14-260281_Supplemental_Data1.pdf [file supp_fj.14-260281_Supplemental_Data1.pdf]

## Supplementary data unit 1

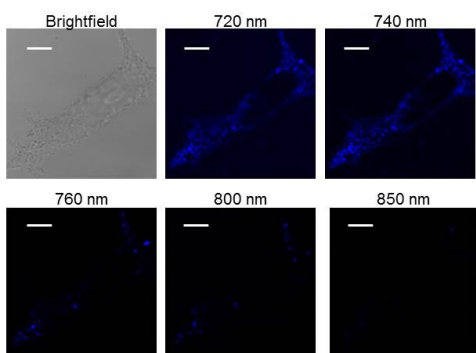

**Figure S1**

Selected cell overexpressing aS and imaged in transmission and exciting at different wavelengths (brightfield, 720 nm, 740 nm, 760 nm, 800 nm and 850 nm) to verify the absence of contributes due to other sources of autofluorescence, i.e. mainly flavins and lipofuscin. White bar correspond to 30  $\mu\text{m}$ .

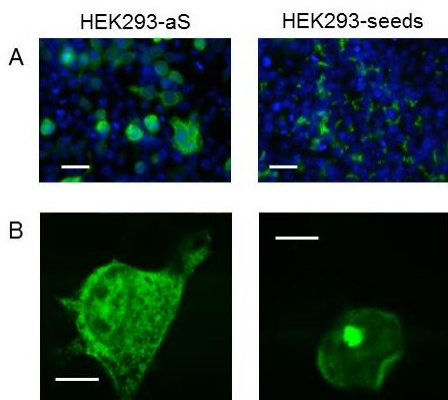

**Figure S2**

Immunocytochemistry of cells overexpressing aS (on the left) and overexpressing aS and treated with seeds (on the right). aS is stained in green, while the blue staining corresponds to the nuclei. Widefield imaging is shown in panel A (scale bar correspond to 20  $\mu\text{m}$ ), while confocal imaging is shown in panel B (scale bar correspond to 10  $\mu\text{m}$ ).

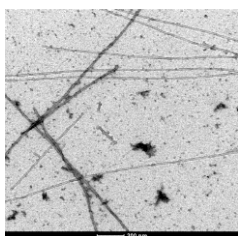

**Figure S3**

TEM micrograph of aS fibrils obtained aggregating aS in the presence of NADH. aS fibrils formed in the presence of NADH resemble perfectly the morphology of the canonical fibrils that we observed and that were also shown by others before.

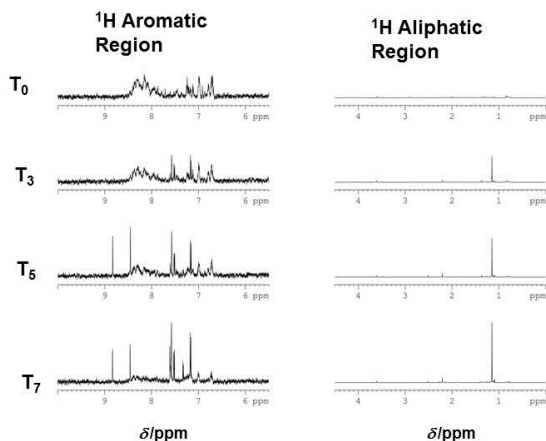

**Figure S4**

1D  $^1\text{H}$  NMR spectra of aS aliquots incubated (5  $\mu\text{M}$ , 37  $^\circ\text{C}$ , 1.000 rpm) for different time periods  $T_0$  (no incubation),  $T_3$  (12 days),  $T_5$  (22 days),  $T_7$  (33 days). Aliphatic region (0 – 4.5 ppm) (right panel); aromatic region (5.5 – 10 ppm) (left panel).
